# Supplementary material
Source: PubMed Central journal article supplement (PMC1502556)
Supplement: pnas_0603797103_10.pdf [file pnas_0603797103_10.pdf]

**Table 7. Representative species of mammalian orders used in this study**

| Order           | Species                                 |
|-----------------|-----------------------------------------|
| Primates        | <i>Homo Sapiens</i> (database)          |
| Dermoptera      | <i>Cynocephalus variegatus</i>          |
| Scandentia      | <i>Tupaia belangeri</i>                 |
| Rodentia        | <i>Mus musculus</i> (database)          |
|                 | <i>Rattus norvegicus</i> (database)     |
| Lagomorpha      | <i>Oryctolagus cuniculus</i>            |
|                 | <i>Oryctolagus cuniculus</i> (database) |
| Cetartiodactyla | <i>Bos taurus</i>                       |
|                 | <i>Bos taurus</i> (database)            |
|                 | <i>Sus sp.</i>                          |
| Perissodactyla  | <i>Equus sp.</i>                        |
| Carnivora       | <i>Felis sp.</i>                        |
|                 | <i>Canis familiaris</i> (database)      |
| Chiroptera      | <i>Pipistrellus abramus</i>             |
|                 | <i>Cynopterus brachyotis</i>            |
|                 | <i>Pteropus dasymallus</i>              |
| Eulipotyphla    | <i>Atelerix albiventris</i>             |
|                 | <i>Sorex sp.</i>                        |
|                 | <i>Mogera wogura</i>                    |
| Xenarthra       | <i>Dasybus novemcinctus</i>             |
|                 | <i>Dasybus novemcinctus</i> (database)  |
|                 | <i>Myrmecophaga tridacctyla</i>         |
|                 | <i>Choloepus didactylus</i>             |
| Proboscidea     | <i>Loxodonta africana</i>               |
|                 | <i>Loxodonta africana</i> (database)    |
| Sirenia         | <i>Trichechus manatus</i>               |
| Hyracoidea      | <i>Procavia capensis</i>                |
| Afrosoricida    | <i>Echinops telfairi</i>                |
| Marsupialia     | <i>Monodelphis domestica</i> (database) |

(Database) indicates the species for which we used database sequences.
