# Supplementary material
Source: PubMed Central journal article supplement (PMC1502556)
Supplement: pnas_0603797103_11.pdf [file pnas_0603797103_11.pdf]

**Table 8. Primer sequences used in this study**

| Locus        | 5' flanking primers                       | 3' flanking primers                                                         |
|--------------|-------------------------------------------|-----------------------------------------------------------------------------|
| INT01        | 5'-CTTATGTAACGTTTTTGGTCATGTAARGT-3'       | 5'-TTATGATGTGGTTATTAATGATTATGAAA-3'<br>5'-TATTAATGATTATGAAAARGCCAAGTCRCT-3' |
| INT0657      | 5'-AGAGCTCCYACAGACACCCTGATG-3'            | 5'-GAAAGTAATGGCTGATGTGGTTCCAGKTCC-3'                                        |
| INT0990      | 5'-ATCTACTGCCAAAACCTGTGCCTKTTG-3'         | 5'-RAGCATCTTGCCATAGCCCTGTCTCAT-3'                                           |
| INT1026      | 5'-GATRCTGTACACATTATCTCGACCCA-3'          | 5'-TGCAWCAGACCATCCTGTGCCATCAG-3'                                            |
| INT1067      | 5'-GTTACCTCYCTGAAAAGTATATAATTGGTTGCTAA-3' | 5'-GACTCTGYACATCTATCCCATGACTCTC-3'                                          |
| INT1075      | 5'-TTCCTTTGATCGAACCTGTGACCACAT-3'         | 5'-TGCTGGGCAGGTACTGRTAGCTG-3'                                               |
| INT1095      | 5'-AAGCSATTTAACTGGWGGTTTCACAAGAA-3'       | 5'-CAAKKGACTTTGAAAAMAGCATGAAGAGATATTTG-3'                                   |
| INT1111      | 5'-AGGAGGCCAGGCATGCTGTACAAAA-3'           | 5'-ATAYTTAACACAGCCAATTTACAAGGGAGGAAG-3'                                     |
| INT1124      | 5'-TGCCATRACCTCAGACATGATCTCTCCA-3'        | 5'-TTACGARAAAAATGCTTAAGCTGCGMCGVGAT-3'                                      |
| INT1167      | 5'-ARGGTCTTCCGTGTCWGSCTGGTACAG-3'         | 5'-GMWGACCATCTGATCCAGGGTTTCCC-3'                                            |
| INT1189      | 5'-TTCACTTCCGAGAGAACKGATCGCT-3'           | 5'-GAACARTTRAAAGAGATYCCATACACTAAARTAGAGT-3'                                 |
| INT1068      | 5'-TGCTRAAGAAGCCAAACTATAAGAARCTAGAACT-3'  | 5'-TTCCATCTTCTAGDACTTAAATTTGTTTTCCT-3'                                      |
| INT1098      | 5'-ATGGHTGTGAAAATGGYCGCTGTGTGAG-3'        | 5'-ACTTGGCRTTCTTGACAGAGACATCCG-3'                                           |
| INT1122      | 5'-AGAAGGAGTTGGAACCAAGGTGATGGAC-3'        | 5'-CTCCATATACGGCCACTGATCGAAGATTAT-3'                                        |
| INT1151      | 5'-CASKTCTTCAGATTGCGTTTGGTAGTT-3'         | 5'-AAATGAACAAAAGAGAATGAAGRTRTGMAAATCA-3'                                    |
| INT1233      | 5'-AAGTGATGGGCCCTCAGAGACCTAGAT-3'         | 5'-YAAAAGGTATTTCTTCTCCAGTATCCAGGTTCTTA-3'                                   |
| INT0904(_Af) | 5'-CTTTTCTCTCTTGATGTGCAAYGGTTCAT-3'       | 5'-TACTGGAGAATTTGGCTGARGAYAACCTT-3'                                         |
| INT0957(_Af) | 5'-GTGGCAATTTGAGAAATCYAGACAA-3'           | 5'-GTGGAGCCAAYACACCTTATGARAAAAG-3'                                          |
| INT0979      | 5'-GTTTAYTCTGTGCWGGCTACTGTGTGG-3'         | 5'-GCACTCTCTCTTATTRATGCCAGGAAAC-3'                                          |
| INT1060      | 5'-CCATKATGANTGCTGGGTTCACTCCA-3'          | 5'-GCCCCAATTTACTATGCAAATAGCGACTT-3'                                         |
| INT048       | 5'-GTGTTTCACCAATAGARTCTCCACCTCG-3'        | 5'-CAGGCTCAAAAATATGGGATCCTACACC-3'                                          |
| INT0964      | 5'-TGTCTCGTCATAAGCATCTAGCCAAGGA-3'        | 5'-TSACTAACTCTACCACTGCATTCCCACCATA-3'                                       |
| INT276       | 5'-GCYGTGTTAGGTTTGTAGAAGATTGGATTGTC-3'    | 5'-CTATHATTGAGGCCATGCCAGTCCCTTGA-3'                                         |
| INT0894      | 5'-GTGBTCATAAGCCACAAATTCATTGAAGAA-3'      | 5'-CAAGAAGAYCCCAAYTCTATWATTGCAGGCAT-3'                                      |
| INT251       | 5'-ATAGTAGAGAACACCCAGYTCATTGAGGG-3'       | 5'-ATGTTYGACTACCCACAGCTGAGTTTGA-3'                                          |
| INT285       | 5'-GAAATAGAACTATTAARCGGCARCAGAA-3'        | 5'-TTTTTAAGATATGAACAAGCTGAACATTTTAGGAA-3'                                   |
| INT315       | 5'-AGTAAACTTGGGTATAACTGTTGTGTTGTT-3'      | 5'-TGAGATTKCCTTMMACCTTCACAACTC-3'                                           |
| INT713       | 5'-TGTCAGTYCCTTCATGRTAATGTTCAA-3'         | 5'-ATCTTATTTAGTCCACCATGGGTACTGT-3'                                          |
| INT810       | 5'-ACTYTCCATCCCTTTGCTGGCATA-3'            | 5'-AGCACCACAGTTATCCAAAATGTAATA-3'                                           |
| INT875       | 5'-CACTRAAFAARATGATGGAGGTGGATGT-3'        | 5'-ACCAACATTGCTGAGACATCCATAACCA-3'                                          |
| INT942       | 5'-TTAGCAACCAAAGCAMGAGAGGGTAAACT-3'       | 5'-GAYAGGATCTATBACACCATGAGGRAACT-3'                                         |
|              | 5'-TACTCCTGCAGGACTCATCACACCTATTGT-3'      | 5'-CCTCTGAAGCACCAATTGCCAAAATAC-3'                                           |
| INT980       | 5'-ATGGAGAAGAGCTTGTAAAAATTGAAAAG-3'       | 5'-TTAGTTTAGATTCTCGATAAGGAACATGAG-3'                                        |
| INT999       | 5'-AGAAGGGCTTTTTAGGAARTCAGGATCTGTT-3'     | 5'-GAAAAGTGCTTCATGCAAATCAGCTGG-3'                                           |
| INT138       | 5'-GTGGCGAGTAAGAAAAGAAGCYATGATGGG-3'      | 5'-AAGCATTTCATTCTCTCTCTGTTTCCAGGT-3'                                        |
| INT226       | 5'-GCAGTTCGWCCYACTCGATGGATRTAATC-3'       | 5'-AGCAARCGCCTAGGATCCCTTAATAAGTT-3'                                         |
| INT237       | 5'-GGTTAGATACATCGGCATGATCCTTYCTGGT-3'     | 5'-ATATCACTACCCCATCCCTGACYTGACT-3'                                          |
| INT165       | 5'-ATCTGATGTCYAGTGACTGAATTTCTGAA-3'       | 5'-TTGCAGATAAAATGGTACTGTGACAGAAAATA-3'                                      |
| INT265       | 5'-AGGCTCTCCMTGRCCACAGCAATCA-3'           | 5'-CTGTCTTTTACATCCATGTTGGGACCA-3'                                           |
| INT382       | 5'-CATAAAATGTGTATCTATCCATAAAGRTGG-3'      | 5'-TAGCTAGTAGCCAAGTGGGAGAAGATTC-3'                                          |
| INT391       | 5'-AATGYTTCTGCTTYCTCAAATGTATGGAG-3'       | 5'-ACCTGTACAATCCTYTCAAACATATGA-3'                                           |
|              | 5'-ACCCYAAAGGAGCCATGCTRACCCAT-3'          |                                                                             |
| INT189       | 5'-TGGCTATCATCATARCCAGTTGTAAGGTC-3'       | 5'-AGAATTTGTCTTTGTCTCAGCARCTAAA-3'                                          |
| INT283       | 5'-GAAYGTGGTTGAAAACTGAATGCCAATGT-3'       | 5'-CTTGGCCCTTGACCATTACTCTGGCTC-3'                                           |
