# Supplementary material
Source: PubMed Central journal article supplement (PMC1502556)
Supplement: pnas_0603797103_12.pdf [file pnas_0603797103_12.pdf]

**Table 9. Mitochondrial genome sequences used in this study**

| Order           | Common name                 | Species                          | GenBank accession no. |
|-----------------|-----------------------------|----------------------------------|-----------------------|
| Chiroptera      | Pipistrelle                 | <i>Pipistrellus abramus</i>      | AB061528              |
|                 | Jamaican fruit-eating bat   | <i>Artibeus jamaicensis</i>      | AF061340              |
|                 | Long-tailed bat             | <i>Chalinolobus tuberculatus</i> | AF321051              |
|                 | Little red flying fox       | <i>Pteropus scapulatus</i>       | AF321050              |
|                 | Ryukyu flying fox           | <i>Pteropus dasymallus</i>       | AB042770              |
| Perissodactyla  | Horse                       | <i>Equus caballus</i>            | X79547                |
|                 | White rhinoceros            | <i>Ceratotherium simum</i>       | Y07726                |
| Cetartiodactyla | Pig                         | <i>Sus scrofa</i>                | AF034253              |
|                 | Cow                         | <i>Bos taurus</i>                | J01394                |
|                 | Hippo                       | <i>Hippopotamus amphibius</i>    | AJ010957              |
|                 | Fin whale                   | <i>Balaenoptera physalus</i>     | X61145                |
| Carnivora       | Domestic cat                | <i>Felis catus</i>               | U20753                |
|                 | Dog                         | <i>Canis familiaris</i>          | U96639                |
|                 | American black bear         | <i>Ursus americanus</i>          | AF303109              |
|                 | Gray seal                   | <i>Halichoerus grypus</i>        | X72004                |
| Eulipotyphla    | Long-clawed shrew           | <i>Sorex unguiculatus</i>        | AB061527              |
|                 | Japanese mole               | <i>Mogera wogura</i>             | AB099482              |
|                 | Greater Japanese shrew-mole | <i>Urotrichus talpoides</i>      | AB099483              |
| Rodentia        | House mouse                 | <i>Mus musculus</i>              | AB042809              |
| Lagomorpha      | European rabbit             | <i>Oryctolagus cuniculus</i>     | AJ001588              |
| Primates        | Ring-tailed lemur           | <i>Lemur catta</i>               | AJ421451              |
|                 | Human                       | <i>Homo sapiens</i>              | D38112                |
