# Supplementary material
Source: PubMed Central journal article supplement (PMC1502556)

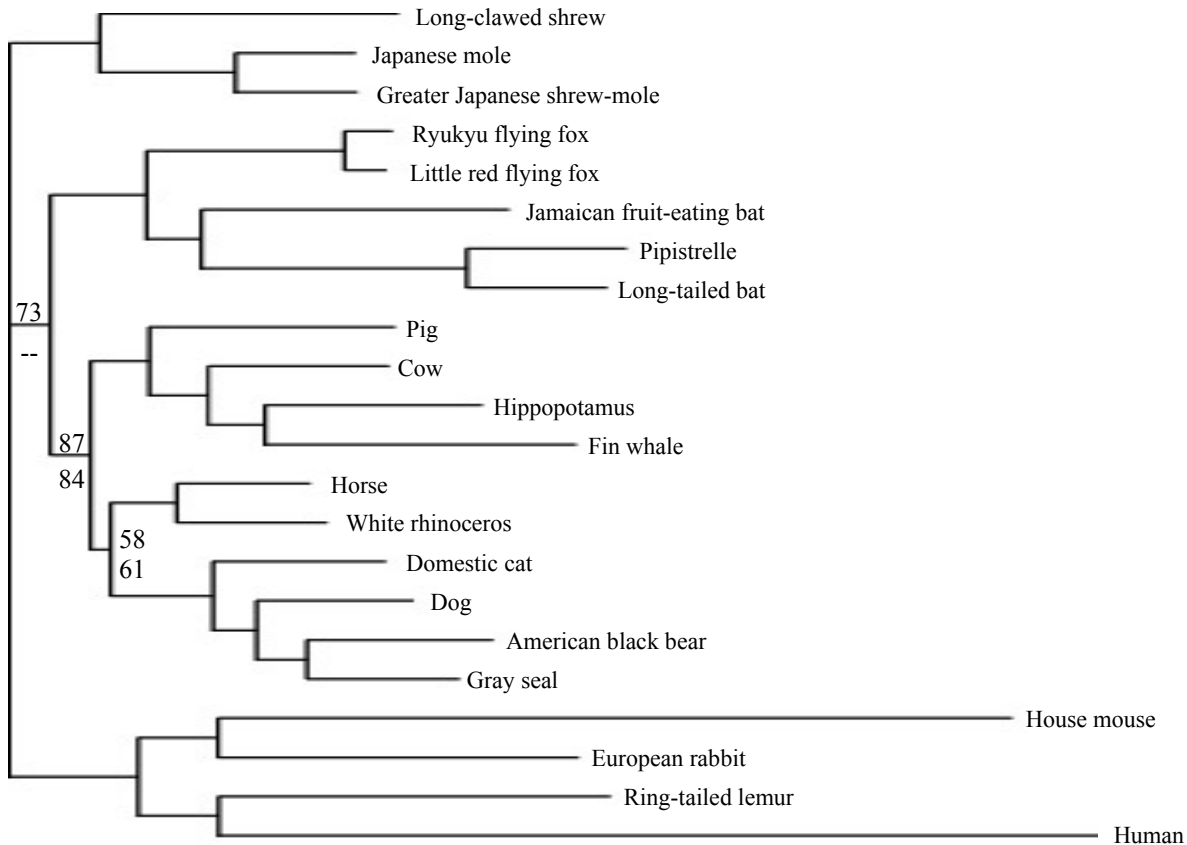

Supplement: pnas_0603797103_4.pdf [file pnas_0603797103_4.pdf]
